# Supplementary material for: Field and experimental evidence of a new caiman trypanosome species closely phylogenetically related to fish trypanosomes and transmitted by leeches
Source: PubMed Central journal article supplement (PMC4683569; doi:10.1016/j.ijppaw.2015.10.005), 2015-10-21

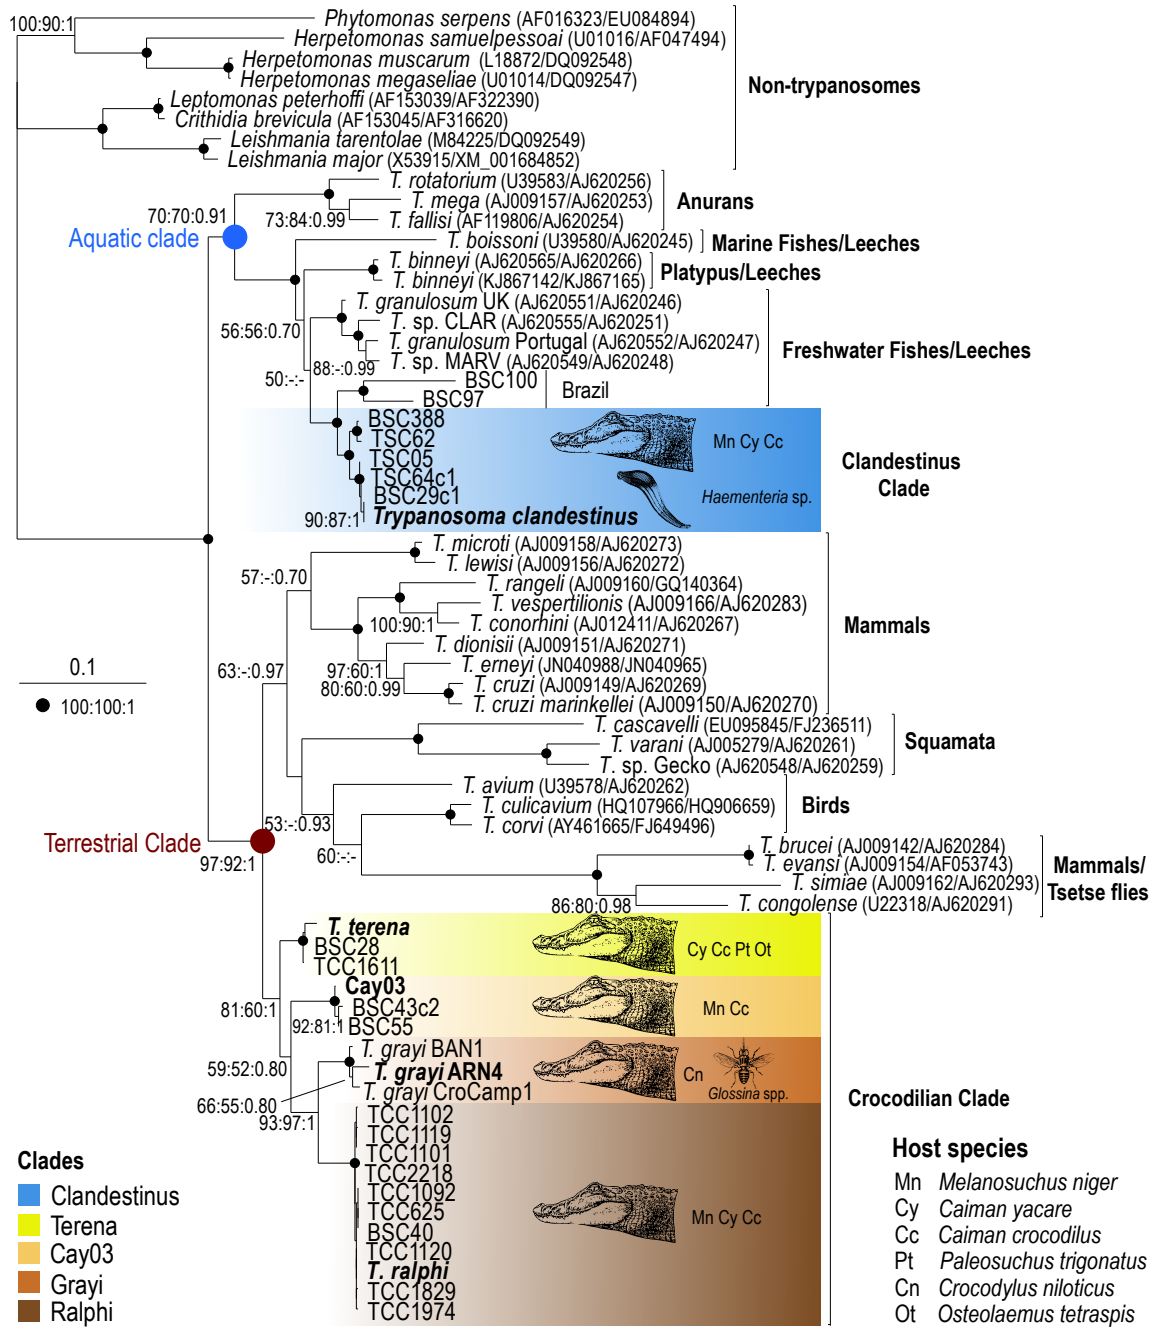

Supplement: mmc1.pdf [file mmc1.pdf]
